# Supplementary material for: T-cell functionality testing is highly relevant to developing novel immuno-tracers monitoring T cells in the context of immunotherapies and revealed CD7 as an attractive target
Source: PubMed Central journal article supplement — Theranostics. 2018 Nov 28;8(21):6070–87. doi: 10.7150/thno.27275 (PMC6299443; doi:10.7150/thno.27275), 2018-11-28
Supplement: thnov08p6070s1.pdf [file thnov08p6070s1.pdf]

## Supplementary Figure Legends and Tables Legends

### Figure S1. Experimental setting of *in vivo* imaging studies.

Mice were inoculated subcutaneously with  $1 \times 10^7$  ML-B7 or ML2-B15 control tumor cells in the right and left flank, respectively. After total body irradiation,  $2 \times 10^7$  TCR2.5D6iRFP T<sub>CM</sub>,  $2 \times 10^7$  iRFP T<sub>CM</sub> or PBS were injected intravenously. **(A)** Experimental setting for immuno-PET imaging. Mice received  $^{89}\text{Zr}$ -labeled F(ab')<sub>2</sub> and imaging was performed at day 5 followed by *ex vivo* analyses. **(B)** Investigation of the impact of F(ab')<sub>2</sub> on T-cell function *in vivo*. Mice were injected intravenously with OKT11 (anti-CD2)-F(ab')<sub>2</sub>, T3-3A1 (anti-CD7)-F(ab')<sub>2</sub> or isotype-F(ab')<sub>2</sub>. Tumor growth is monitored over 11 days followed by *ex vivo* analyses.

### Figure S2. CD2, CD3 and CD7 are expressed on all T-cell subsets.

Flow cytometric analysis of CD2, CD3 and CD7 expression on the surface of different T-cell subsets from freshly isolated peripheral blood mononuclear cells (PBMC). **(A)** Expression on CD4<sup>+</sup> T-cell subpopulations. CD3<sup>+</sup> cells were gated on CD4<sup>+</sup> cells and analyzed for the single T-cell subpopulations naïve T cells (T<sub>N</sub>; CD45RA<sup>+</sup>CD62L<sup>+</sup>), central memory T cells (T<sub>CM</sub>; CD45RA<sup>-</sup>CD62L<sup>+</sup>), effector memory T cells (T<sub>EM</sub>; CD45RA<sup>-</sup>CD62L<sup>-</sup>), effector T cells (T<sub>EFF</sub>; CD45RA<sup>+</sup>CD62L<sup>-</sup>) and regulatory T cells (T<sub>Reg</sub>; CD127<sup>-</sup>CD25<sup>+</sup>) (left side). Respective histograms of T-cell subpopulation staining with PE-labeled anti-CD2, anti-CD3, anti-CD7 and PE-isotype control antibodies are shown on the right side. **(B)** Expression on CD8<sup>+</sup> T-cell subpopulations. As described above, CD3<sup>+</sup> cells were gated on CD8 and then analyzed for the respective T-cell subpopulations (left side). Histograms show the respective expression of CD2, CD3 and CD7 (right side).

### Figure S3. Expression of CD2, CD7 and CD3 on different subsets of freshly isolated PBMC.

Mean fluorescence intensity (MFI) values of CD2 (left panel), CD3 (middle panel) and CD7 (right panel) expression on various subsets of peripheral mononuclear blood cells (PBMC). Therefore, 7-AAD<sup>-</sup> pre-gated cells were analyzed for monocytes (CD33<sup>+</sup>CD14<sup>+</sup>), B cells (CD20<sup>+</sup>), NK cells

(CD56<sup>+</sup>) and NK T cells (CD3<sup>+</sup>CD56<sup>+</sup>). The experiment was performed with blood cells from three different donors (n=3) and the results of one representative experiment are shown.

**Figure S4. Anti-CD3, but not anti-CD2 and anti-CD7 antibodies induce apoptosis of PBMC-derived T cells *in vitro* with correspondingly high IFN $\gamma$  production.**

PBMC-derived T cells were incubated with different antibody concentrations for 18h. OKT3 served as positive control. Data are shown as mean  $\pm$  standard deviation (sd) from triplicates. One representative of three performed experiments is shown (n=3). **(A)** Percentage of apoptotic cells (Annexin5 or 7-AAD positive) after incubation at various concentrations of depicted antibodies. **(B)** Corresponding IFN $\gamma$  levels in supernatant of incubated cells.

**Figure S5. SE-HPLC analysis of OKT11 (anti-CD2) and T3-3A1 (anti-CD7) IgG and F(ab')<sub>2</sub> revealed one subclass (IgG1) for OKT11 (anti-CD2) and two subclasses (IgG1, IgG2a) for T3-3A1 (anti-CD7), both specific for CD7.**

**(A)** SE-HPLC analysis for OKT11 (anti-CD2) and T3-3A1 (anti-CD7) IgG and F(ab')<sub>2</sub>. **(B)** Optical density (OD) of isotype subclasses from analysis of OKT11 (anti-CD2)-IgG (left panel) and T3-3A1 (anti-CD7)-IgG (right panel) by ELISA. **(C)** Flow cytometry plots for binding of T3-3A1 (anti-CD7)-IgG mixture (IgG1/IgG2a) to T cells with and without preceding blocking of the CD7 antigen by a sheep anti-human CD7 antibody. Cells were stained for bound IgG1 (left panel) and IgG2a (middle panel). OKT3 (anti-CD3)-IgG (IgG2a) served as negative control for blocking of IgG1 and OKT11 (anti-CD2)-IgG (IgG1) for blocking of IgG2a. Specificity of the sheep anti-human CD7 antibody was confirmed by secondary staining with anti-sheep antibody (right panel).

**Figure S6. Selected OKT11 (anti-CD2) and T3-3A1 (anti-CD7) IgG and respective F(ab')<sub>2</sub> do not induce IFN $\gamma$  release.**

PBMC-derived T cells were incubated for 72 h at 37 °C with 100 nM of indicated IgG and F(ab')<sub>2</sub>. Incubation with isotypes served as negative control and OKT3 (anti-CD3)-IgG as positive control. IFN $\gamma$  secretion detected in the supernatant is shown as mean  $\pm$  sd from triplicates (n=3).

**Figure S7. T3-3A1 (anti-CD7) IgG as well as F(ab')<sub>2</sub> do not induce IFN $\gamma$  release nor proliferation at different dose levels *in vitro*.**

(A) IFN $\gamma$  release of PBMC-derived T cells after 18 h of co-cultivation with the indicated IgG and F(ab')<sub>2</sub> at depicted concentrations. Respective isotypes and OKT3 (anti-CD3)-IgG served as controls. Mean  $\pm$  sd is depicted (n=3). (B) Plots on MFI of CTV stained cells after incubation with different dose levels of tested IgG, F(ab')<sub>2</sub> and controls. (C) Corresponding IFN $\gamma$  release at depicted time points.

**Table S1. Percentage of CD2, CD3 and CD7 expressing cells on CD4<sup>+</sup> T-cell subpopulations.**

The percentages of CD3<sup>+</sup> of all cells alive, CD4<sup>+</sup> of CD3<sup>+</sup> cells and T-cell subpopulations on CD4<sup>+</sup> cells are presented as mean  $\pm$  sd from all analyzed samples. The single T-cell subpopulations are naïve T cells (T<sub>N</sub>; CD45RA<sup>+</sup>CD62L<sup>+</sup>), central memory T cells (T<sub>CM</sub>; CD45RA<sup>-</sup>CD62L<sup>+</sup>), effector memory T cells (T<sub>EM</sub>; CD45RA<sup>-</sup>CD62L<sup>-</sup>), effector T cells (T<sub>EFF</sub>; CD45RA<sup>+</sup>CD62L<sup>-</sup>) and regulatory T cells (T<sub>Reg</sub>; CD4<sup>+</sup>CD25<sup>+</sup>CD127<sup>low</sup>). Moreover, the percentage of CD2<sup>+</sup>, CD3<sup>+</sup> and CD3<sup>+</sup> cells for different T-cell subsets is depicted.

**Table S2. Percentage of CD2, CD3 and CD7 expressing cells on CD8<sup>+</sup> T-cell subpopulations.**

As described for Table S2, the percentages of CD3<sup>+</sup> of all cells alive, CD8<sup>+</sup> of CD3<sup>+</sup> cells and T-cell subpopulations on CD8<sup>+</sup> cells are presented as mean  $\pm$  sd from all analyzed samples. The single T-cell subpopulations are naïve T cells (T<sub>N</sub>; CD45RA<sup>+</sup>CD62L<sup>+</sup>), central memory T cells (T<sub>CM</sub>; CD45RA<sup>-</sup>CD62L<sup>+</sup>), effector memory T cells (T<sub>EM</sub>; CD45RA<sup>-</sup>CD62L<sup>-</sup>) and effector T cells (T<sub>EFF</sub>;

CD45RA<sup>+</sup>CD62L<sup>-</sup>). Besides, the percentage of CD2<sup>+</sup>, CD7<sup>+</sup> and CD3<sup>+</sup> cells for different T-cell subsets is depicted.

**Table S3. Biodistribution results of in vivo T-cell imaging at the specific tumor site by immuno-PET using <sup>89</sup>Zr-OKT11 (anti-CD2)-F(ab')<sub>2</sub>.**

The percentage injected dose per gram (%ID/g) of the depicted organs from animals injected with TCR2.5D6iRFP T<sub>CM</sub> (n=3) or PBS (n=1) and receiving <sup>89</sup>Zr-OKT11 (anti-CD2)-F(ab')<sub>2</sub> is shown for each animal as well as mean ± sd for the TCR2.5D6iRFP T<sub>CM</sub> injected mice.

**Table S4. Biodistribution results of in vivo T-cell imaging at the specific tumor site by immuno-PET using <sup>89</sup>Zr-T3-3A1 (anti-CD7)-F(ab')<sub>2</sub>.**

%ID/g of different organs from animals injected with TCR2.5D6iRFP T<sub>CM</sub> (n=3) or PBS (n=1) and receiving <sup>89</sup>Zr-T3-3A1 (anti-CD7)-F(ab')<sub>2</sub> is shown for each animal as well as mean ± sd for the TCR2.5D6iRFP T<sub>CM</sub> injected mice.

**Table S5. Biodistribution results of in vivo T-cell imaging at the specific tumor site by immuno-PET using <sup>89</sup>Zr-T3-3A1 (anti-CD7)-F(ab')<sub>2</sub>.**

The table depicts %ID/g of ex vivo analysis of different organs from animals injected with TCR2.5D6iRFP T<sub>CM</sub> (n=7) or iRFP T<sub>CM</sub> (n=6) which all received <sup>89</sup>Zr-T3-3A1 (anti-CD7)-F(ab')<sub>2</sub>. Data of each animal as well as mean ± sd for the groups is shown.

# Figure S1

## A Experimental setting: Immuno-PET

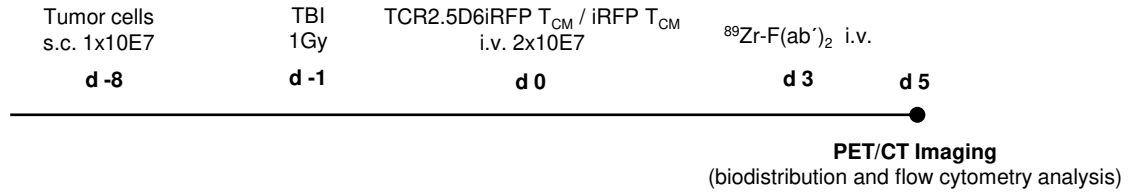

## B Experimental setting: Functionality

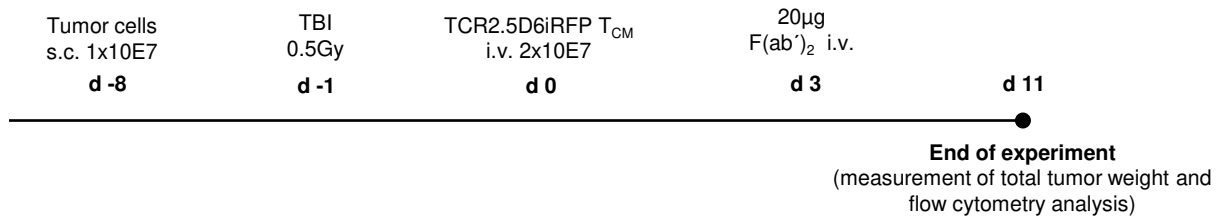

# Figure S2

**A**

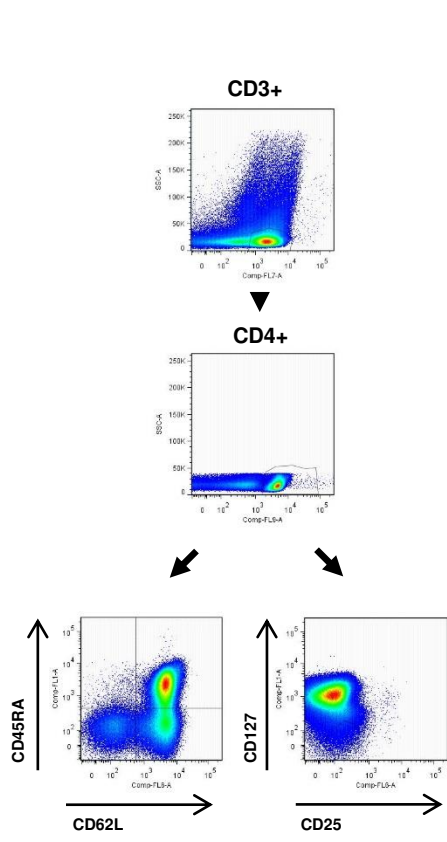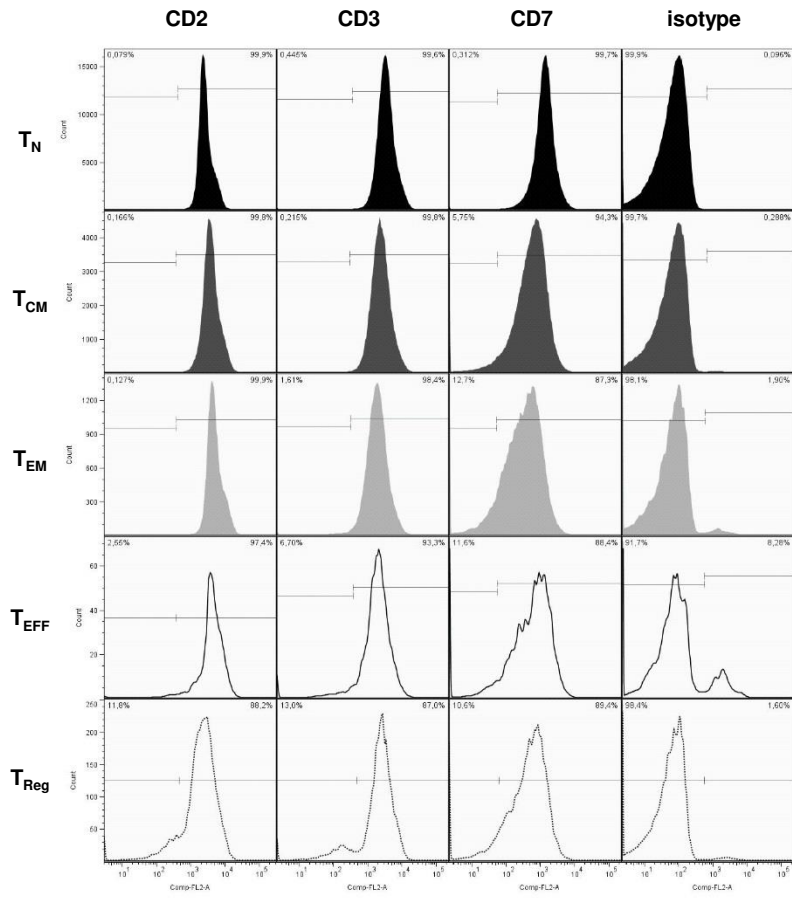

**B**

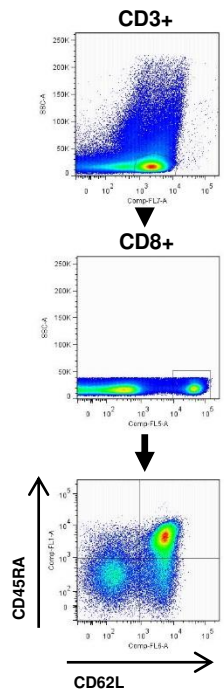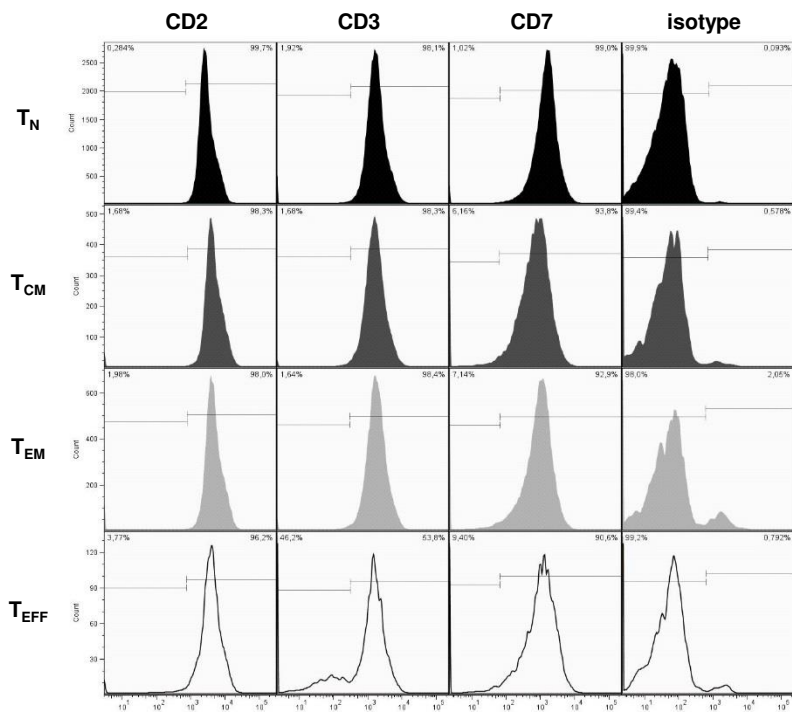

# Figure S3

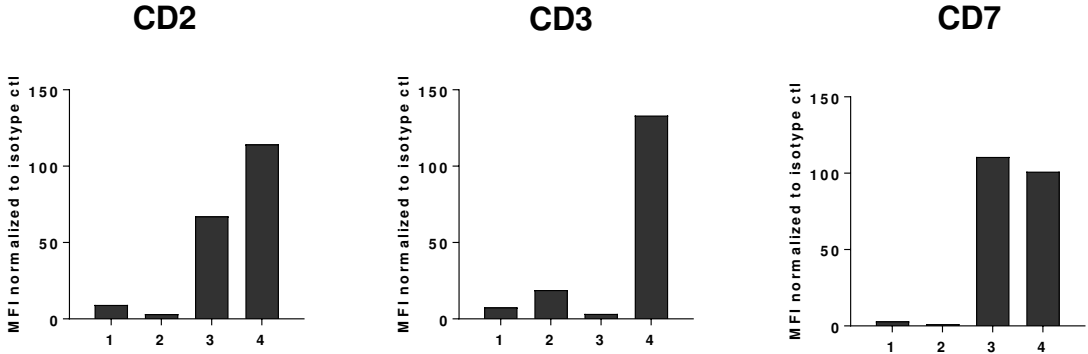

- 1 monocytes (CD33<sup>+</sup>CD14<sup>+</sup>)**
- 2 B cells (CD20<sup>+</sup>)**
- 3 NK cells (CD56<sup>+</sup>)**
- 4 NK T cells (CD56<sup>+</sup>CD3<sup>+</sup>)**

# Figure S4

**A**

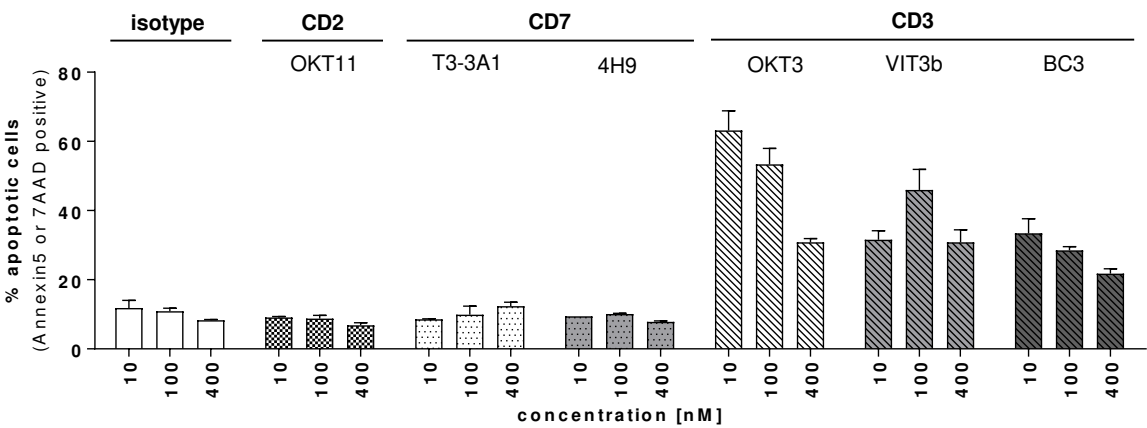

**B**

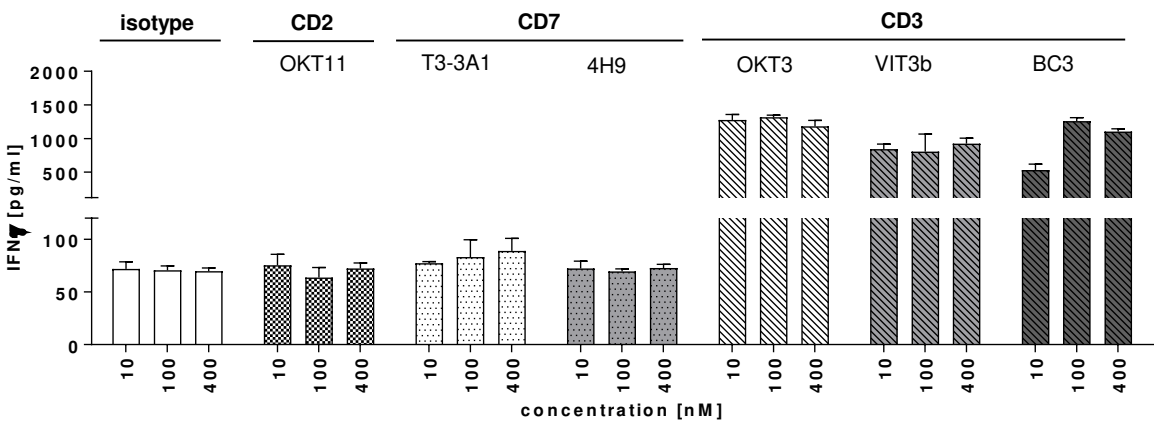



# Figure S5

**A**

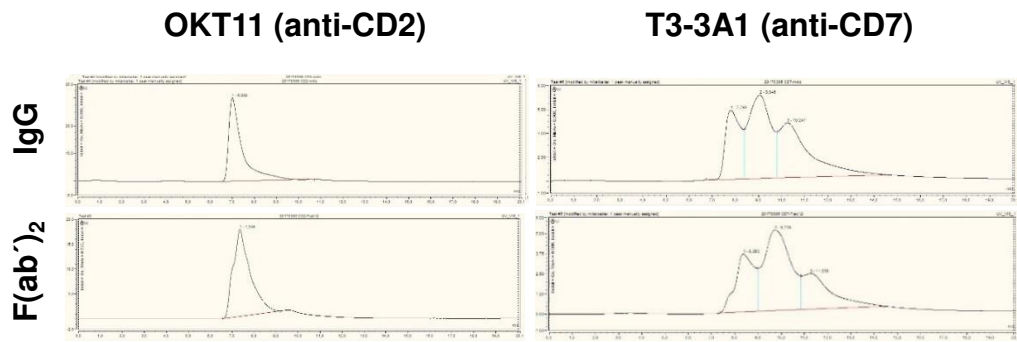

**B**

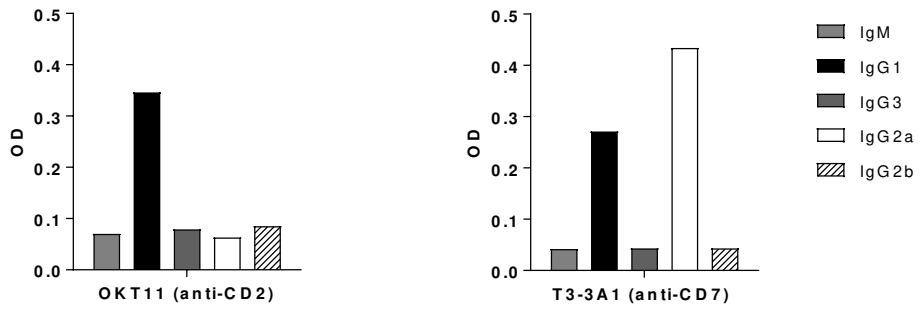

**C**

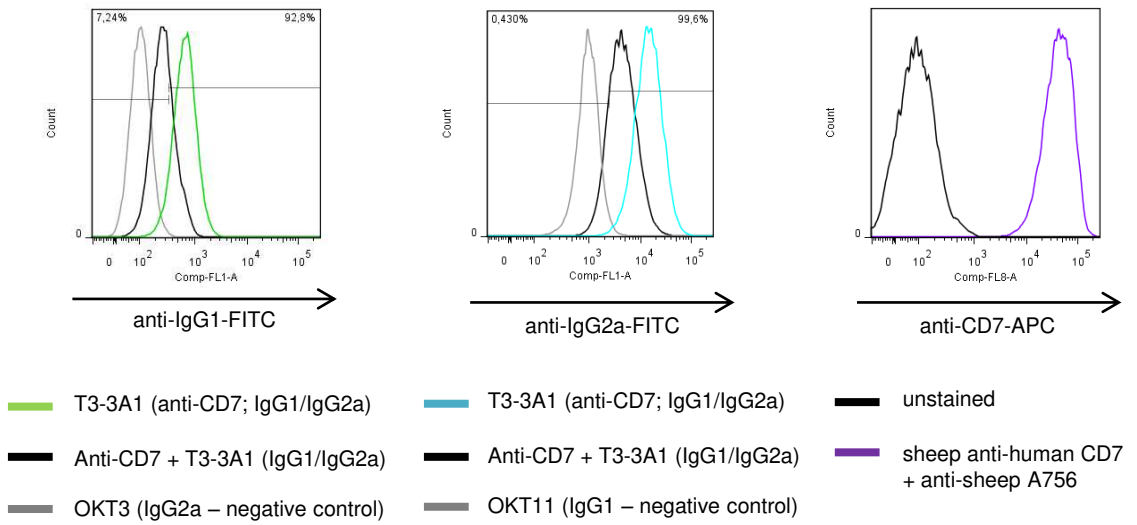

# Figure S6

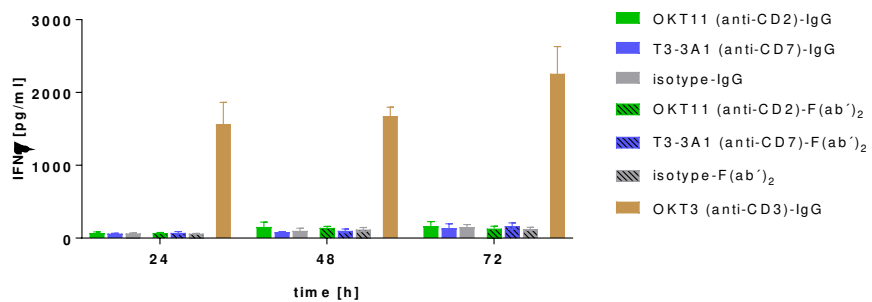

# Figure S7

**A**

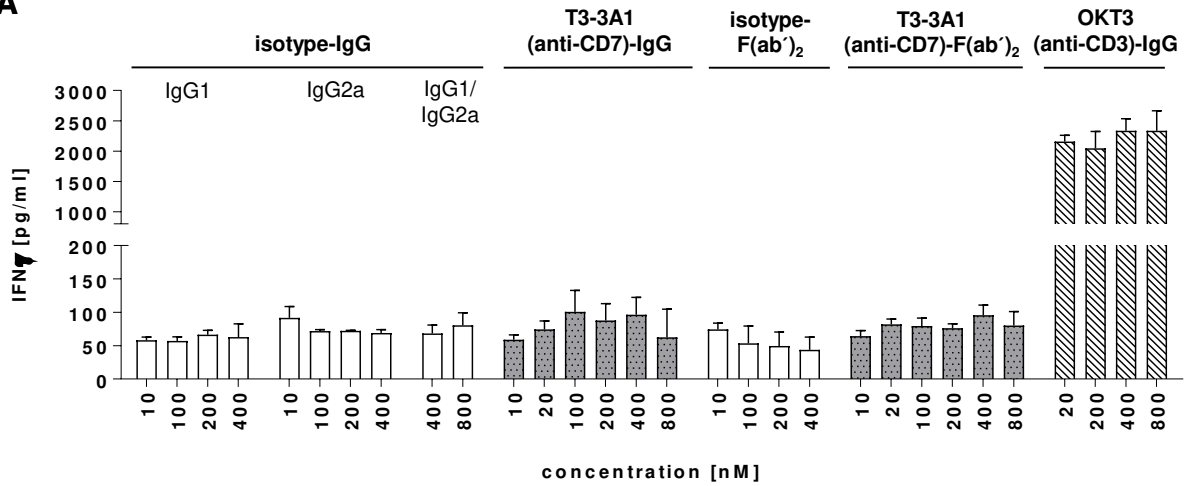

**B**

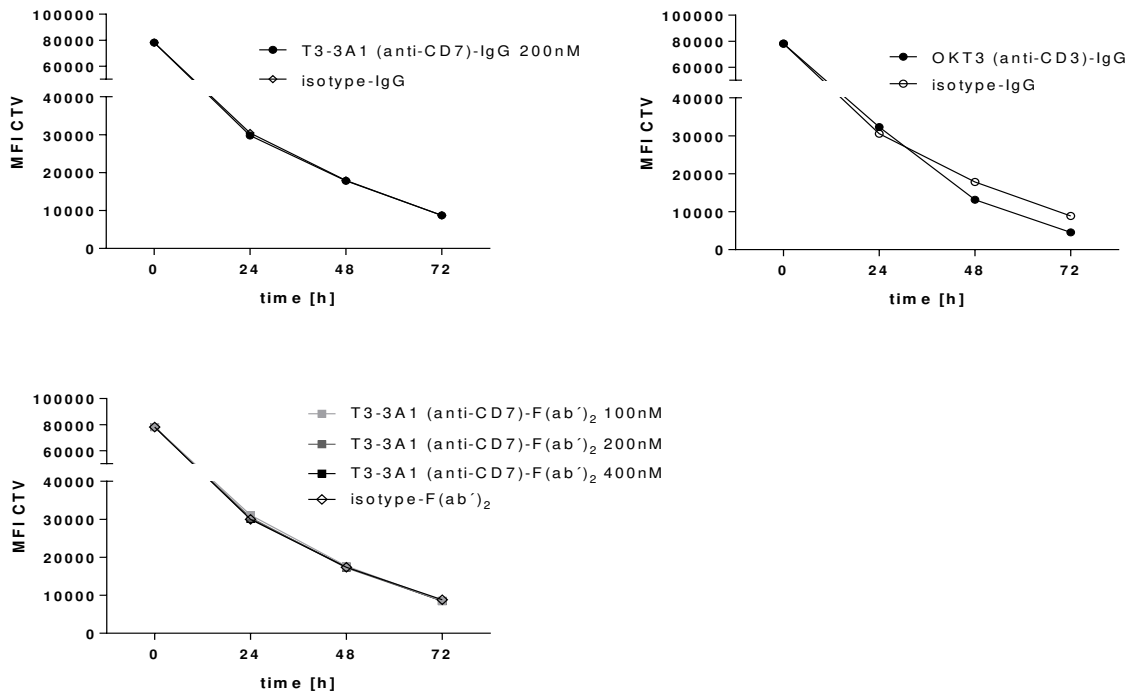

**C**

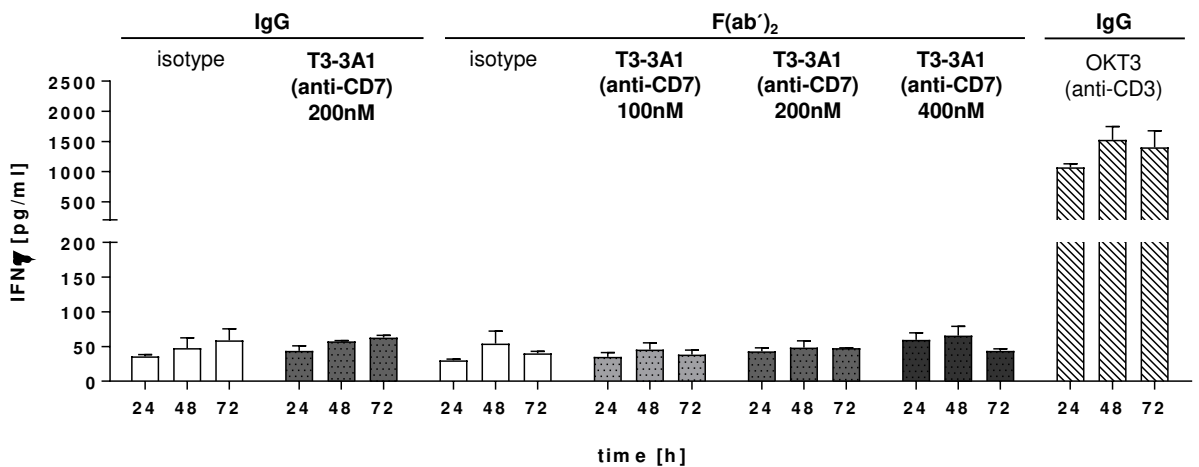

**Table S1**

| <b>CD3<sup>+</sup> (68,6 ± 2,3%/all cells alive)</b> |                        |                        |                        |                |
|------------------------------------------------------|------------------------|------------------------|------------------------|----------------|
| <b>CD4<sup>+</sup> (74,3 ± 8,5%/CD3<sup>+</sup>)</b> | <b>CD2<sup>+</sup></b> | <b>CD3<sup>+</sup></b> | <b>CD7<sup>+</sup></b> | <b>isotype</b> |
| <b>T<sub>N</sub> (67,3 ± 2,8%/CD4<sup>+</sup>)</b>   | 99,9%                  | 99,6%                  | 99,7%                  | 0,1%           |
| <b>T<sub>CM</sub> (24,8 ± 2,3%/CD4<sup>+</sup>)</b>  | 99,8%                  | 99,8%                  | 94,3%                  | 0,3%           |
| <b>T<sub>EM</sub> (7,3 ± 0,7%/CD4<sup>+</sup>)</b>   | 99,9%                  | 98,4%                  | 87,3%                  | 1,9%           |
| <b>T<sub>EFF</sub> (0,7 ± 0,2%/CD4<sup>+</sup>)</b>  | 97,3%                  | 93,3%                  | 88,4%                  | 8,3%           |
| <b>T<sub>Reg</sub> (1,4 ± 0,2%/CD4<sup>+</sup>)</b>  | 88,2%                  | 87,0%                  | 89,4%                  | 1,6%           |

**Table S2**

| <b>CD3<sup>+</sup> (68,6 ± 2,3%/all cells alive)</b> |                        |                        |                        |                |
|------------------------------------------------------|------------------------|------------------------|------------------------|----------------|
| <b>CD8<sup>+</sup> (16,0 ± 2,1%/CD3<sup>+</sup>)</b> | <b>CD2<sup>+</sup></b> | <b>CD3<sup>+</sup></b> | <b>CD7<sup>+</sup></b> | <b>isotype</b> |
| <b>T<sub>N</sub> (64,3 ± 2,3%/CD4<sup>+</sup>)</b>   | 99,7%                  | 98,1%                  | 99,0%                  | 0,1%           |
| <b>T<sub>CM</sub> (13,3 ± 1,9%/CD4<sup>+</sup>)</b>  | 98,3%                  | 98,3%                  | 93,8%                  | 0,6%           |
| <b>T<sub>EM</sub> (17,7 ± 1,1%/CD4<sup>+</sup>)</b>  | 98,0%                  | 98,4%                  | 92,9%                  | 2,1%           |
| <b>T<sub>EFF</sub> (4,8 ± 0,8%/CD4<sup>+</sup>)</b>  | 96,2%                  | 53,8%                  | 90,6%                  | 0,8%           |

**Table S3**

| <sup>89</sup> Zr-OKT11<br>(anti-CD2)-F(ab') <sub>2</sub> | 2.5D6iRFP T <sub>CM</sub> |       |       |              | PBS   |
|----------------------------------------------------------|---------------------------|-------|-------|--------------|-------|
| %ID/g                                                    | 1                         | 2     | 3     | mean ± sd    | 1     |
| ML2-B7                                                   | 21,11                     | 8,27  | 9,36  | 12,91 ± 5,81 | 3,81  |
| ML2-B15                                                  | 2,76                      | 2,60  | 3,02  | 2,80 ± 0,17  | 3,34  |
| spleen                                                   | 27,87                     | 36,81 | 31,79 | 32,15± 3,66  | 14,24 |
| liver                                                    | 9,38                      | 10,11 | 8,07  | 9,19 ± 0,84  | 8,17  |
| lung                                                     | 7,76                      | 7,10  | 3,87  | 6,24 ± 1,70  | 4,70  |
| kidney                                                   | 42,92                     | 38,49 | 23,57 | 34,99 ± 8,28 | 56,48 |
| muscle                                                   | 1,08                      | 0,81  | 0,92  | 0,93 ± 0,11  | 1,23  |
| blood                                                    | 4,38                      | 3,42  | 3,80  | 3,87 ± 0,39  | 6,65  |

**Table S4**

| <sup>89</sup> Zr-T3-3A1<br>(anti-CD7)-F(ab') <sub>2</sub> | 2.5D6iRFP T <sub>CM</sub> |       |       |               | PBS   |
|-----------------------------------------------------------|---------------------------|-------|-------|---------------|-------|
| %ID/g                                                     | 1                         | 2     | 3     | mean ± sd     | 1     |
| ML2-B7                                                    | 13,31                     | 13,65 | 8,87  | 11,93 ± 2,18  | 1,95  |
| ML2-B15                                                   | 3,23                      | 2,42  | 1,78  | 2,48 ± 0,59   | 1,93  |
| spleen                                                    | 22,19                     | 19,29 | 13,92 | 18,46 ± 3,43  | 8,17  |
| liver                                                     | 7,24                      | 6,94  | 5,58  | 6,59 ± 0,72   | 4,91  |
| lung                                                      | 4,87                      | 3,64  | 2,98  | 3,83 ± 0,78   | 2,06  |
| kidney                                                    | 65,19                     | 49,37 | 32,31 | 48,96 ± 13,43 | 29,86 |
| muscle                                                    | 1,44                      | 0,49  | 0,57  | 0,83 ± 0,43   | 0,71  |
| blood                                                     | 2,29                      | 1,99  | 1,47  | 1,92 ± 0,34   | 1,63  |

**Table S5****<sup>89</sup>Zr-T3-3A1 (anti-CD7)-F(ab')<sub>2</sub>**

|         | 2.5D6iRFP TCM |       |       |       |       |       |       |               | iRFP TCM |       |       |       |       |       |               |
|---------|---------------|-------|-------|-------|-------|-------|-------|---------------|----------|-------|-------|-------|-------|-------|---------------|
| %ID/g   | 1             | 2     | 3     | 4     | 5     | 6     | 7     | mean ±<br>sd  | 1        | 2     | 3     | 4     | 5     | 6     | mean ±<br>sd  |
| ML2-B7  | 2,02          | 1,92  | 1,89  | 1,67  | 1,93  | 1,78  | 2,37  | 1,94 ± 0,20   | 2,06     | 2,13  | 2,16  | 1,60  | 1,45  | 1,58  | 1,83 ± 0,29   |
| ML2-B15 | 18,63         | 11,92 | 11,72 | 13,57 | 11,97 | 12,20 | 13,61 | 13,37 ± 2,27  | 10,30    | 15,58 | 18,74 | 13,49 | 10,76 | 7,96  | 12,80 ± 3,59  |
| spleen  | 6,28          | 5,56  | 5,63  | 6,27  | 5,26  | 4,55  | 6,05  | 5,66 ± 0,57   | 5,08     | 6,62  | 7,75  | 4,97  | 4,17  | 4,18  | 5,46 ± 1,31   |
| liver   | 2,87          | 3,38  | 3,23  | 3,35  | 1,94  | 2,06  | 2,45  | 2,75 ± 0,56   | 2,33     | 2,49  | 3,15  | 1,86  | 1,52  | 1,42  | 2,13 ± 0,60   |
| lung    | 42,72         | 44,13 | 44,82 | 46,16 | 19,41 | 24,64 | 31,23 | 36,16 ± 10,14 | 40,57    | 45,11 | 55,54 | 18,43 | 23,26 | 19,91 | 33,80 ± 14,06 |
| kidney  | 0,56          | 0,67  | 0,56  | 0,58  | 0,52  | 0,56  | 0,65  | 0,59 ± 0,05   | 0,80     | 0,61  | 1,45  | 0,52  | 0,63  | 0,53  | 0,76 ± 0,32   |
| muscle  | 2,70          | 2,68  | 2,88  | 2,37  | 2,19  | 2,27  | 2,68  | 2,54 ± 0,24   | 2,73     | 2,95  | 3,49  | 2,05  | 1,83  | 1,77  | 2,47 ± 0,63   |
| blood   | 2,02          | 1,92  | 1,89  | 1,67  | 1,93  | 1,78  | 2,37  | 1,94 ± 0,20   | 2,06     | 2,13  | 2,16  | 1,60  | 1,45  | 1,58  | 1,83 ± 0,29   |
